# Supplementary material for: Variable-pressure kinetic study of bromide complexation on aquarhodium(iii)
Source: Royal Society of Chemistry journal article supplement (doi:10.1039/b207017k), 2002-01-01
Supplement: b207017k.doc [file b207017k.doc]

# **Figure 1S:** Plots of kobs values (h-1) versus [Br-] (0.10 – 1.00 mol dm-3) for the highest [H+] values; 0.22 (), 0.50 () and 1.00mol dm-3 (), T = 70oC, I = 2.03mol dm-3 (NaClO4).

##### Table 1S: Rate constants (kobs) (s-1) as a function of [Br-] (0.10 – 1.00mol dm-3) and [H+] (0.06 – 1.00 mol dm-3) for the reaction of Rh3+(aq) (1-2 x 10-3mol dm-3) with Br-, T = 70oC, P = 1 atm. (0.1MPa), I = 2.03mol dm-3 (NaClO4).

[Br-] / mol dm-3 [H+] /mol dm-3 105 kobs / s-1

0.10 1.00 0.15

0.50 0.23

0.22 0.55

0.13 0.79

0.09 1.17

0.06 1.40

0.13 1.00 0.13

0.50 0.33

0.22 0.54

0.13 0.90

0.09 1.30

0.06 1.79

0.20 1.00 0.21

0.50 0.49

0.22 0.88

0.13 1.48

0.09 2.25

0.06 2.83

0.40 1.00 0.33

0.50 0.85

0.22 1.64

0.13 2.62

0.09 4.02

- 1. 5.42

0.70 1.00 0.68

0.13 4.47

0.06 9.04

- 1. 1.00 0.64

0.22 3.46

0.13 6.01

0.09 8.58

0.06 12.16

1.00 1.00 0.87

0.50 1.64

0.22 3.88

0.13 6.60

0.09 10.09

0.06 13.31

**Table 2S**: Slopes from plots of kobs vs [Br-] as [Br-]  0 as a function of [H+] and pressure, temp = 70oC, I = 2.03mol dm-3 (NaClO4).

Pressure [H+] 105 (kobs/[Br-])[Br-]0

/ MPa /mol dm-3 /dm3 mol-1 s-1

0.1 0.06 13.2

0.09 9.75

0.13 6.50

0.22 4.02

0.50 2.10

1. 1.00 1.05
2. 68.9 0.06 9.72

0.09 6.72

0.13 5.36

0.22 3.08

1.00 0.81

137.8 0.06 8.05

0.09 5.83

0.13 4.47

0.22 2.60

1.00 0.75

206.8 0.06 6.83

0.09 4.61

0.13 3.35

0.22 2.25

##### 1.00 0.84
