# Supplementary figures and images for: Variable-pressure kinetic study of bromide complexation on aquarhodium(iii)
Source: Royal Society of Chemistry journal article supplement (doi:10.1039/b207017k), 2002-01-01

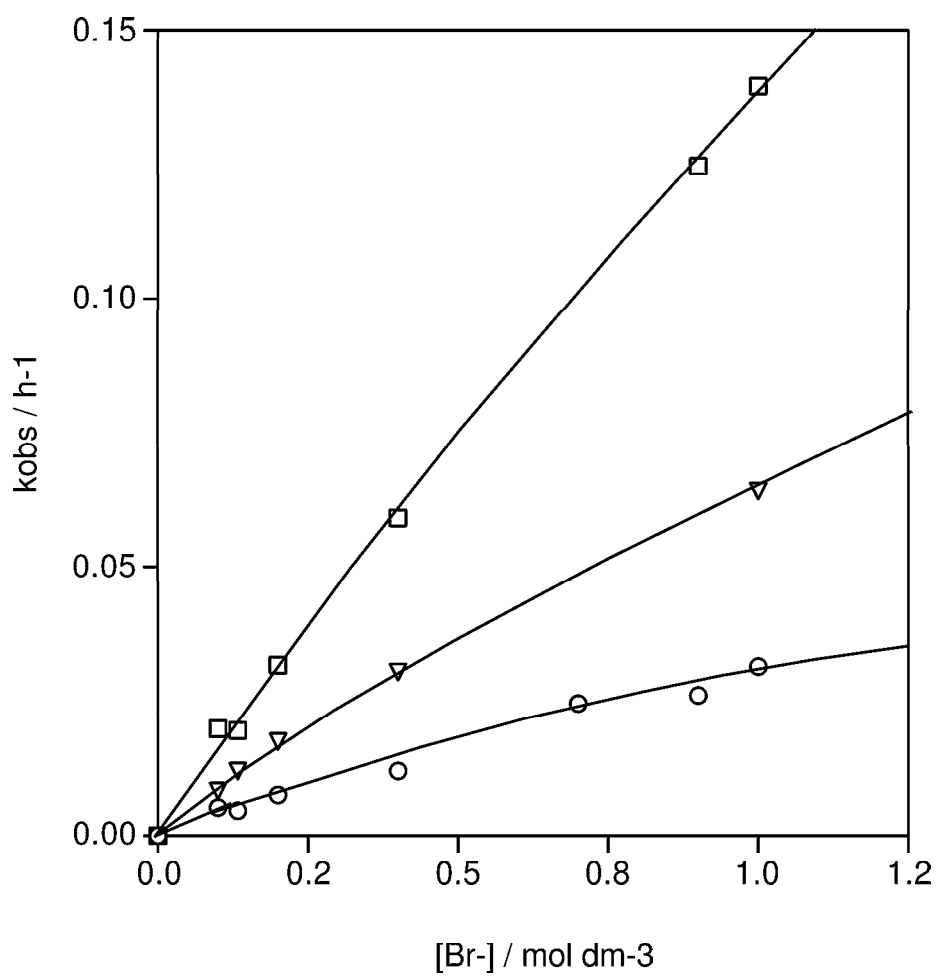

- $k_{obs}$  ( $1\text{M H}^+$ )
- ▽  $k_{obs}$  ( $0.5\text{M H}^+$ )
- $k_{obs}$  ( $0.222\text{M H}^+$ )

Supplement: b207017k.pdf [file b207017k.pdf]
